# Supplementary material
Source: PubMed Central journal article supplement (PMC6078441)
Supplement: supp_RA117.001201_134273_1_supp_129496_pxbxwy.pdf [file supp_RA117.001201_134273_1_supp_129496_pxbxwy.pdf]

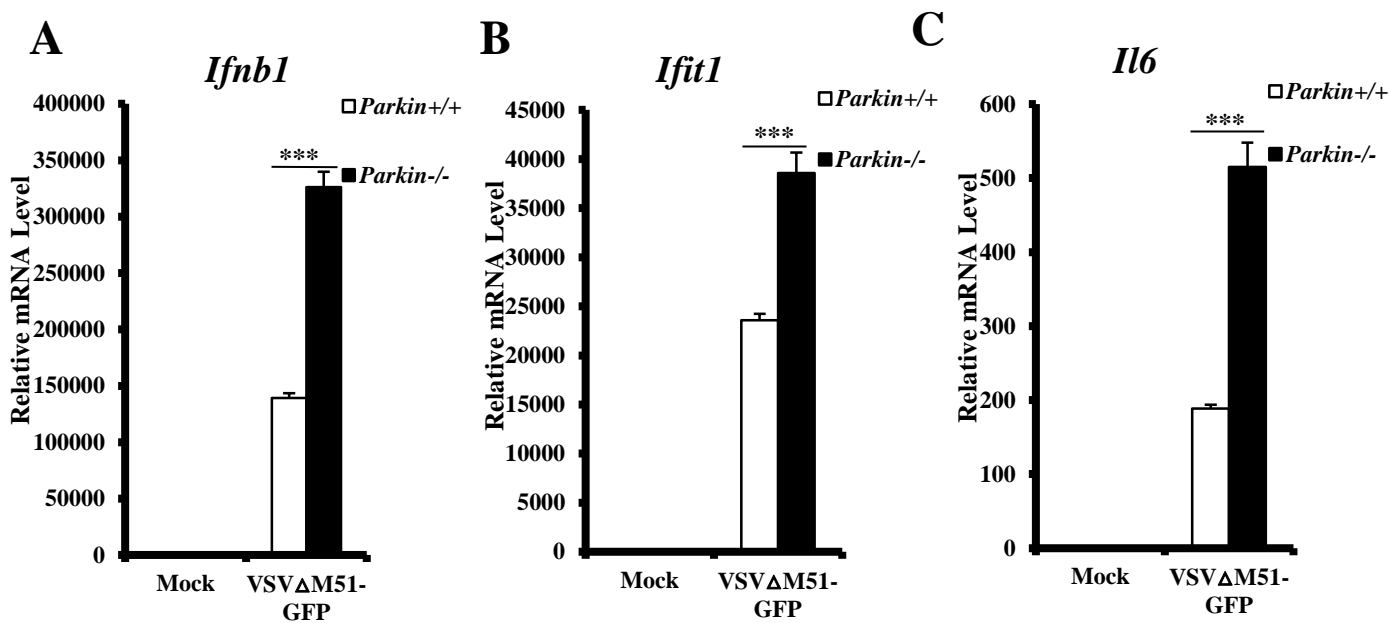

**Figure. S1 Parkin deficiency significantly enhanced VSVΔM51-GFP-induced transcriptional levels of antiviral genes.** (A-C) Primary *Parkin*<sup>+/+</sup> and *Parkin*<sup>-/-</sup> MEFs were infected with VSVΔM51-GFP at a MOI of 0.5 for 12 h, and lysed to measure transcript levels of *Ifnb1* (A), *Ifit1* (B), and *Il6* (C) by qRT-PCR analysis.

A

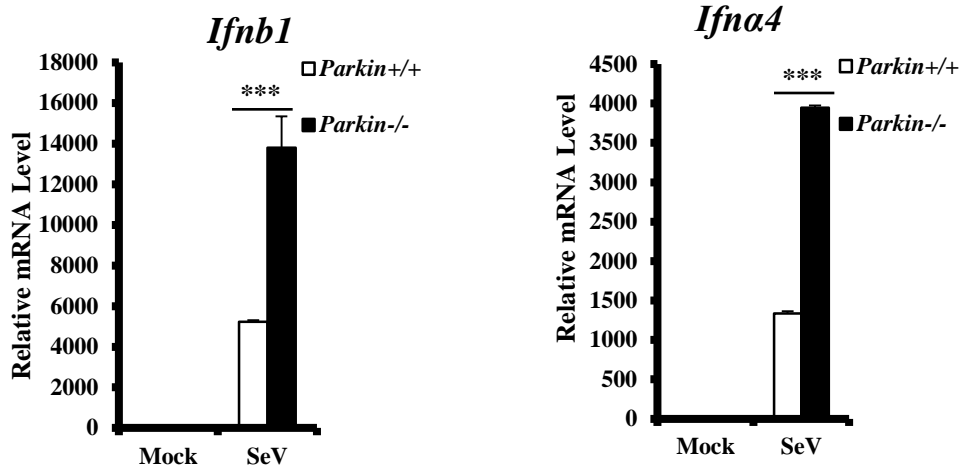

B

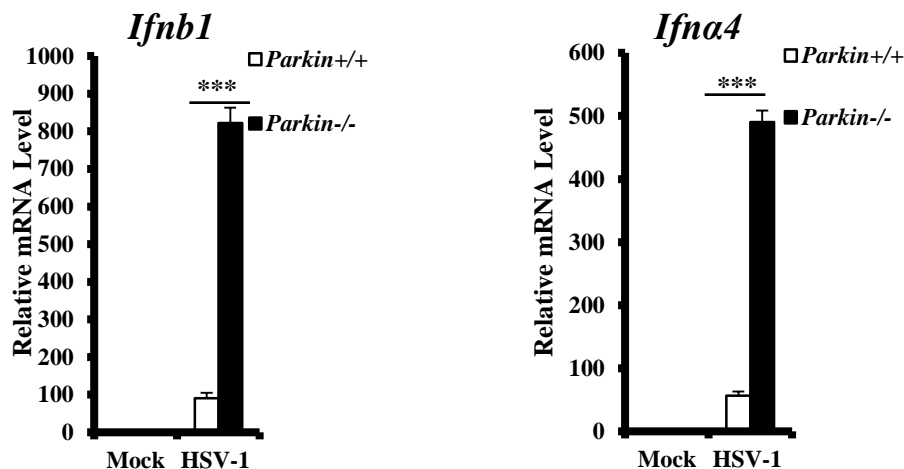

**Figure. S2** Parkin deficiency significantly enhanced SeV- or HSV-1-induced transcriptional levels of antiviral genes in *Parkin*<sup>-/-</sup> immortalized MEFs.

(A-B) Immortalized *Parkin*<sup>+/+</sup> and *Parkin*<sup>-/-</sup> MEFs were infected with SeV for 9 h (A) or herpes simplex virus 1 (HSV-1) at a multiplicity of infection (MOI) of 5 for 9 h (B), followed by qRT-PCR analysis to measure transcript levels of *Ifnb1* and *Ifna4*.

**A**

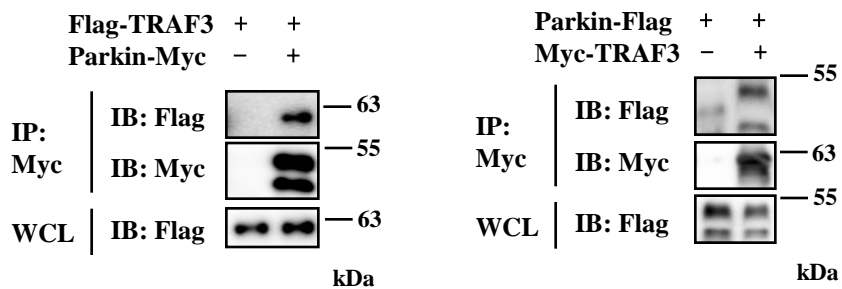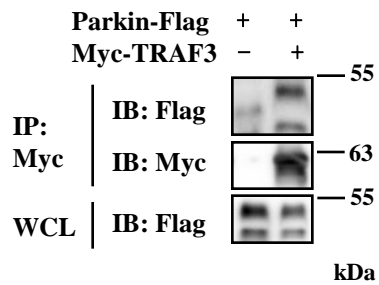

**B**

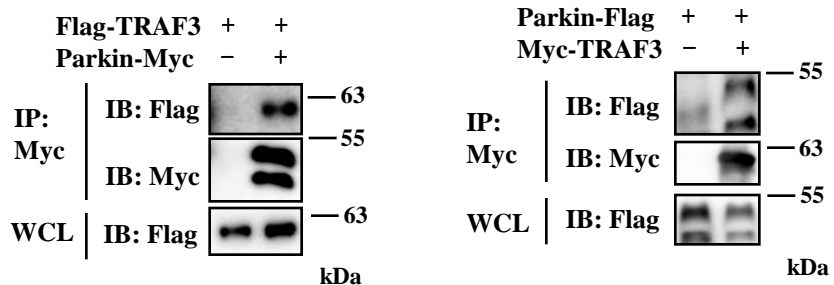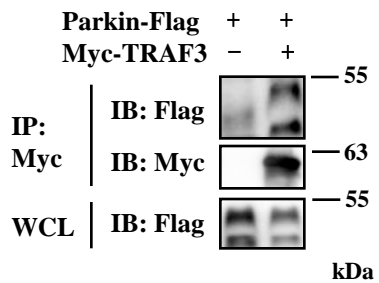

**Figure. S3 Parkin and TRAF3 interacted with each other in the presence or absence of EDTA in HEK293 cells.**

(A, B) HEK293 cells were transfected with the indicated expression plasmids. Twenty-four hours after transfection, cell lysates in the presence (A) or absence of EDTA(B) were immunoprecipitated with anti-Myc beads and analyzed by immunoblotting with the indicated antibodies. Bottom panel, expression of exogenous proteins in whole-cell lysates (WCL).

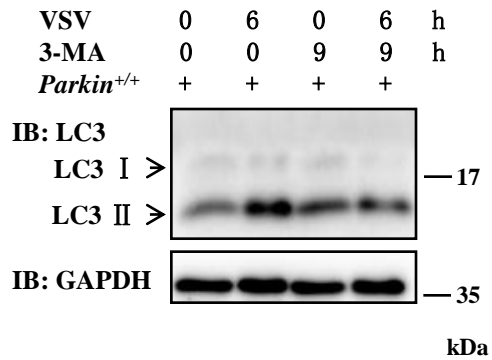

**Figure. S4 Autophagy inhibitor 3-MA inhibited VSV-induced autophagy.**

Immortalized *Parkin*<sup>+/+</sup> MEFs were left untreated or treated with 3-methyladenine (3-MA) (final concentration, 5mM) and infected with VSV at MOI of 1 for the indicated times. Cell lysates were analyzed by immunoblotting with the indicated antibodies.

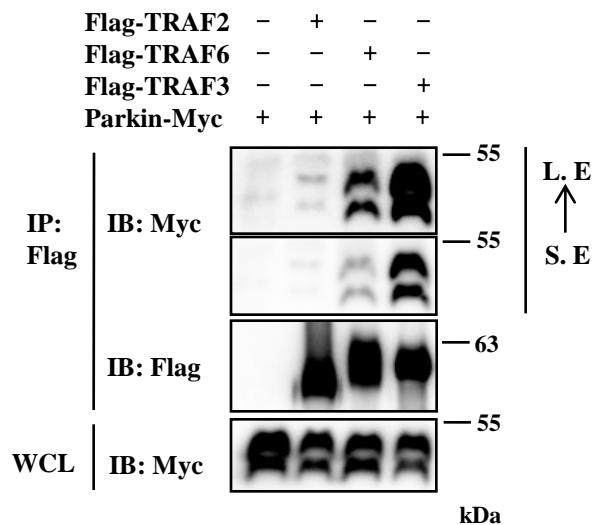

**Figure. S5 Overexpressed Parkin weakly interacted with TRAF2 or TRAF6, compared toTRAF3.**

HEK293 cells were transfected with the indicated expression plasmids. Twenty-four hours after transfection, cell lysates were immunoprecipitated with anti-Flag beads and analyzed by immunoblotting with the indicated antibodies. Bottom panel, expression of exogenous proteins in whole-cell lysates (WCL). S. E, Short Exposure; L. E, Long Exposure.

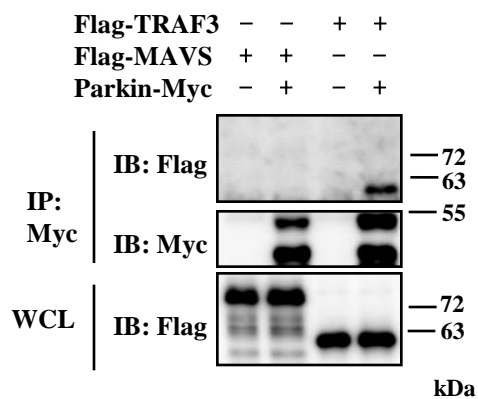**Figure. S6 Parkin failed to interact with MAVS.**

HEK293 cells were transfected with the indicated expression plasmids. Twenty-four hours after transfection, cell lysates were immunoprecipitated with anti-Myc beads and analyzed by immunoblotting with the indicated antibodies. Bottom panel, expression of exogenous proteins in whole-cell lysates (WCL).
